# Supplementary material
Source: PubMed Central journal article supplement (PMC2705569)
Supplement: 0904412106_0904412106SI.pdf [file 0904412106_0904412106SI.pdf]

# Supporting Information

Zhou et al. 10.1073/pnas.0904412106

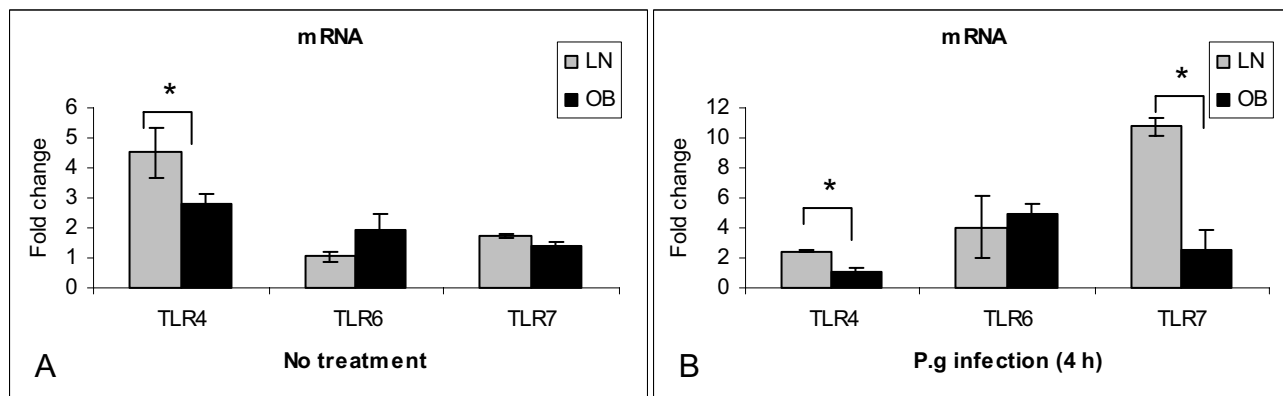

**Fig. S1.** Effect of DIO on TLRs expression. (A) Total RNA was purified from untreated BMM $\Phi$  from lean (LN) or obese (OB) mice; the mRNA for *TLR4*, *TLR6*, or *TLR7* was measured by real-time RT-PCR. (B) BMM $\Phi$  from lean and obese mice were infected with *P. gingivalis* for 4 h, and the mRNA for *TLR4*, *TLR6*, or *TLR7* was detected by real-time RT-PCR. Data are expressed as mean  $\pm$  SEM ( $n = 3$ ;  $*P < 0.05$ ).

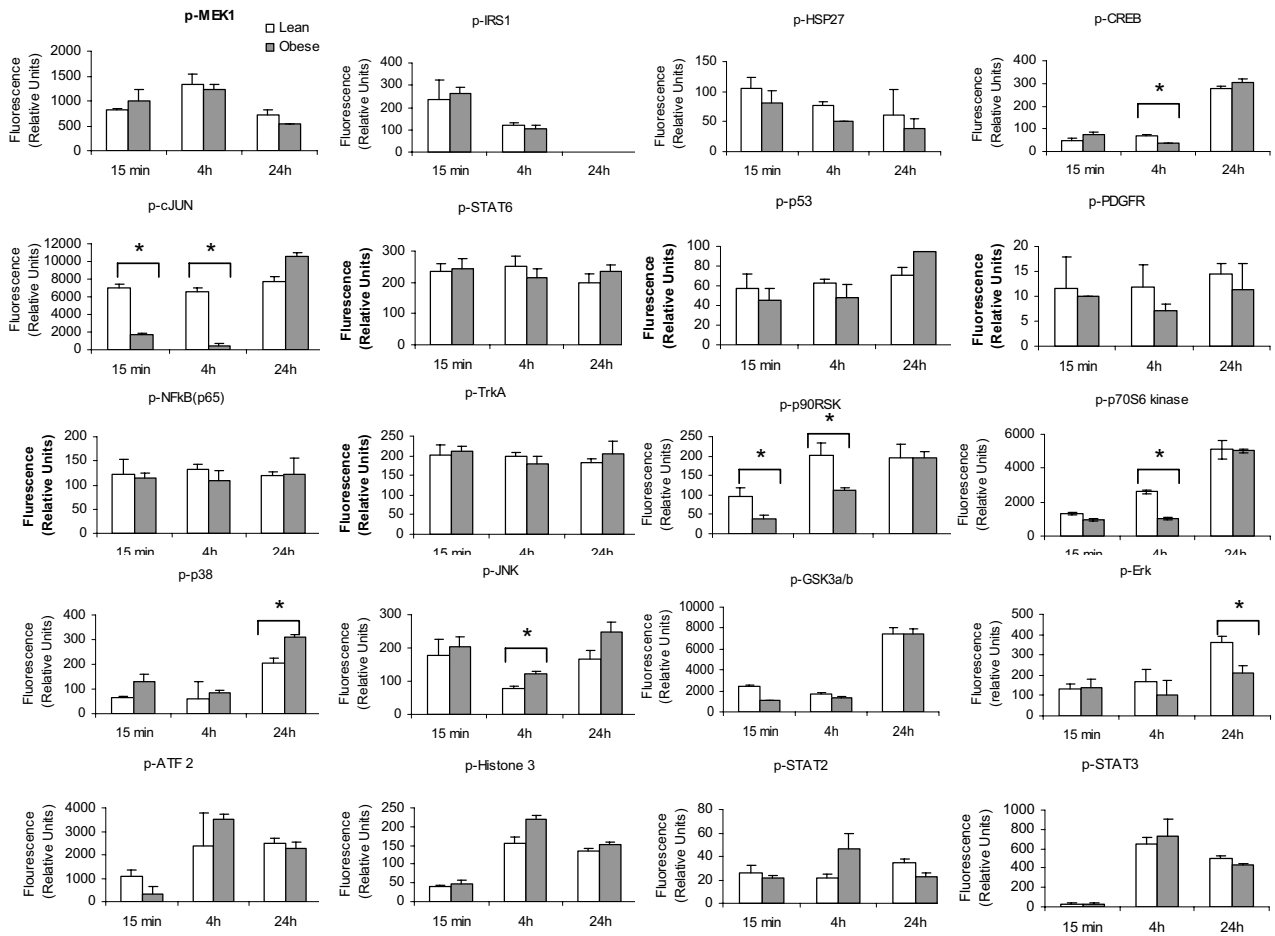

**Fig. S2.** Bio-Plex phosphorylation protein array. BMMΦ from lean (LN) and obese (OB) mice were stimulated with *P. gingivalis* for 15 min, 4 and 24 h; the phosphorylated proteins were quantitated in the cell lysates by using Bio-Plex phosphorylation protein array. Data are expressed as mean ± SEM (n = 3; \*P < 0.05).

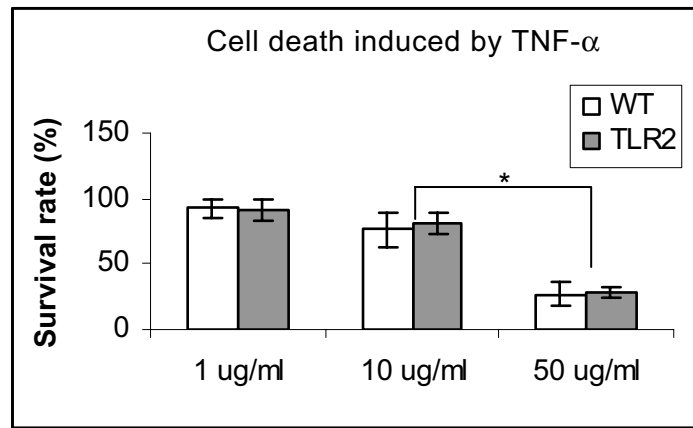

**Fig. S3.** Cell death induced by TNF- $\alpha$ . BMM $\Phi$  were treated with TNF- $\alpha$  for 4 h. The effect of TNF- $\alpha$  on survival of BMM $\Phi$  was determined by trypan blue dye exclusion assay. Survival rate (%) of the treated BMM $\Phi$  was calculated by dividing the surviving number of treated BMM $\Phi$  by number of total BMM $\Phi$  at indicated dosages of TNF- $\alpha$ . Data are expressed as mean  $\pm$  SEM ( $n = 3$ ;  $*P < 0.05$ ).
